# Supplementary material for: Achilles tendon rupture healing is enhanced by intermittent pneumatic compression upregulating collagen type I synthesis
Source: PubMed Central journal article supplement (PMC6061441; doi:10.1007/s00167-017-4621-8), 2017-07-01
Supplement: 167_2017_4621_MOESM1_ESM.pdf [file 167_2017_4621_MOESM1_ESM.pdf]

## Supplemental Digital Content 2.

**Table S2.** Patient-reported outcome measures in the IPC- vs plaster cast groups at 3 months

| ATRS 3 months    | IPC |      |      | Plaster cast |      |      | P     |
|------------------|-----|------|------|--------------|------|------|-------|
|                  | n   | M    | SD   | n            | M    | SD   |       |
| Strength         | 62  | 4.47 | 2.09 | 68           | 4.06 | 2.34 | 0.297 |
| Tiredness        | 61  | 5.16 | 2.60 | 68           | 4.93 | 2.59 | 0.605 |
| Stiffness        | 62  | 4.87 | 2.61 | 68           | 5.07 | 2.59 | 0.658 |
| Pain             | 62  | 7.00 | 2.56 | 68           | 6.97 | 2.72 | 0.950 |
| ADL              | 62  | 6.00 | 2.62 | 68           | 5.76 | 2.74 | 0.619 |
| Uneven surface   | 60  | 5.43 | 2.58 | 66           | 5.27 | 2.64 | 0.731 |
| Stairs/hills     | 60  | 5.12 | 2.69 | 66           | 4.48 | 2.87 | 0.206 |
| When running     | 56  | 1.36 | 2.18 | 66           | 1.45 | 2.21 | 0.808 |
| When jumping     | 57  | 1.54 | 2.39 | 65           | 1.23 | 1.93 | 0.425 |
| Physical work    | 59  | 4.19 | 3.06 | 65           | 3.82 | 2.69 | 0.473 |
| <b>Total sum</b> | 55  | 46.3 | 16.7 | 64           | 43.2 | 18.5 | 0.344 |

ATRS, Achilles Tendon Ruptured Score; The ATRS consists of 10 questions that can be scored from 0 to 10, leading to a total summed score of 0-100; a lower score indicates more symptoms and greater limitation of physical activity and quality of life; ADL, Activity of daily living; n, number of patients, SD, Standard Deviation; P, Significance (p-value set <0.05\*).

### Supplemental Digital Content 3.

**Table S3.** Patient-reported outcome measures in the IPC- vs plaster cast groups at 12 months

| ATRS 12 months       | IPC |       |       | Plaster cast |      |       | p     |
|----------------------|-----|-------|-------|--------------|------|-------|-------|
|                      | n   | M     | SD    | n            | M    | SD    |       |
| Strength             | 57  | 6.79  | 2.52  | 69           | 7.23 | 2.28  | 0.304 |
| Tiredness            | 57  | 7.44  | 2.30  | 69           | 7.83 | 2.29  | 0.347 |
| Stiffness            | 57  | 7.23  | 2.38  | 69           | 7.19 | 2.55  | 0.929 |
| Pain                 | 57  | 8.95  | 1.74  | 69           | 8.63 | 2.14  | 0.371 |
| ADL                  | 56  | 8.57  | 2.02  | 69           | 8.68 | 1.92  | 0.757 |
| Uneven surface       | 56  | 8.46  | 1.92  | 69           | 8.83 | 1.79  | 0.278 |
| Stairs/hills         | 56  | 8.30  | 1.83  | 69           | 8.45 | 1.95  | 0.670 |
| When running         | 54  | 6.93  | 2.71  | 67           | 7.18 | 2.91  | 0.625 |
| When jumping         | 55  | 6.24  | 2.99  | 68           | 6.57 | 3.09  | 0.542 |
| Physical work        | 56  | 8.05  | 2.27  | 69           | 8.22 | 2.31  | 0.691 |
| <b>Total sum</b>     | 53  | 77.8  | 17.2  | 68           | 78   | 19.3  | 0.962 |
| <b>FAOS</b>          |     |       |       |              |      |       |       |
| Pain                 | 55  | 94.75 | 8.24  | 68           | 94.0 | 9.89  | 0.671 |
| Symptom              | 55  | 87.40 | 12.06 | 68           | 86.2 | 13.49 | 0.601 |
| ADL                  | 55  | 97.18 | 4.48  | 68           | 95.8 | 7.69  | 0.236 |
| Sport and recreation | 55  | 83.89 | 16.95 | 66           | 80.0 | 19.3  | 0.246 |
| Foot and ankle-QoL   | 55  | 68.30 | 19.66 | 69           | 69.2 | 21.6  | 0.807 |
| <b>PAS</b>           |     |       |       |              |      |       |       |
| Degree of activity   | 53  | 4.57  | 0.77  | 67           | 4.64 | 0.88  | 0.623 |
| Degree of activity   | 53  | 3.74  | 1.15  | 63           | 3.98 | 1.10  | 0.237 |
| <b>EQ5D index</b>    |     |       |       |              |      |       |       |
| EQ5D index           | 55  | 0.92  | 0.11  | 60           | 0.91 | 0.11  | 0.662 |

ATRS, Achilles Tendon Ruptured Score; The ATRS consists of 10 questions that can be scored from 0 to 10, leading to a total summed score of 0-100; a lower score indicates more symptoms and greater limitation of physical activity and quality of life; ADL, Activity of daily living; FAOS, Foot and Ankle Outcome Score consists of 5 subscales and where a total score of 100 indicates no symptoms and 0 indicates extreme symptoms; For PAS a score of 1 means that a patient is mostly sedentary, whereas a score of 6 means that a patient has engaged in heavy physical exercise several times per week. An EQ-VAS score of 0 is considered to be the worst imaginable health state and a score of 100 the superlative imaginable health state; n= number of patients, SD, Standard Deviation; P= Significance (p-value set <0.05\*).

### Supplemental Digital Content 4.

**Table S4.** Functional outcome in the IPC- vs plaster cast groups (12 months)

| Functional Outcome         |           | IPC |      |      | Plaster cast |      |      | p     |
|----------------------------|-----------|-----|------|------|--------------|------|------|-------|
|                            |           | n   | M    | SD   | n            | Mean | SD   |       |
| Concentric power (W)       | Injured   | 55  | 37.0 | 11.3 | 70           | 36.8 | 11.6 | 0.933 |
|                            | Uninjured | 56  | 44.8 | 9.22 | 70           | 45.8 | 11.9 | 0.608 |
|                            | LSI (%)   | 52  | 74.2 | 32.3 | 69           | 81.3 | 24.3 | 0.170 |
| Total conc. work (J)       | Injured   | 55  | 1748 | 663  | 70           | 1690 | 716  | 0.645 |
|                            | Uninjured | 56  | 2526 | 761  | 70           | 2582 | 768  | 0.684 |
|                            | LSI (%)   | 55  | 69.4 | 20.1 | 70           | 66.8 | 22.2 | 0.498 |
| Heel-rise repetitions      | Injured   | 55  | 24.7 | 7.42 | 70           | 24.4 | 7.98 | 0.841 |
|                            | Uninjured | 56  | 29.9 | 8.43 | 70           | 30.4 | 8.84 | 0.741 |
|                            | LSI (%)   | 55  | 84.1 | 19.1 | 70           | 83.0 | 22.5 | 0.777 |
| Avg. heel-rise height (cm) | Injured   | 55  | 8.28 | 2.18 | 70           | 8.36 | 2.23 | 0.852 |
|                            | Uninjured | 56  | 10.1 | 1.71 | 70           | 10.6 | 2.07 | 0.110 |
|                            | LSI (%)   | 55  | 82.5 | 17.0 | 70           | 78.5 | 14.6 | 0.163 |
| Eccentric power (W)        | Injured   | 31  | 34.1 | 11.6 | 39           | 33.4 | 10.5 | 0.784 |
|                            | Uninjured | 32  | 42   | 9.18 | 39           | 42.9 | 11.1 | 0.705 |
|                            | LSI (%)   | 32  | 82.6 | 22.9 | 39           | 78.2 | 15.8 | 0.340 |

Limb Symmetry Index (LSI = (injured/uninjured)\*100) was calculated for concentric power, total concentric work, number of heel-rise repetitions, average heel-rise height and eccentric power.
